# Supplementary material for: Production of Monoclonal Antibodies to Pathologic β-sheet Oligomeric Conformers in Neurodegenerative Diseases
Source: PubMed Central journal article supplement (PMC5575137; doi:10.1038/s41598-017-10393-z), 2017-08-29
Supplement: 41598_2017_10393_MOESM1_ESM.pdf [file 41598_2017_10393_MOESM1_ESM.pdf]

**Supplemental Information for:**  
**Production of Monoclonal Antibodies to Pathologic  $\beta$ -sheet Oligomeric  
Conformers in Neurodegenerative Diseases**

Fernando Goñi<sup>1\*</sup>, Mitchell Martí-Ariza<sup>1</sup>, Daniel Peyser<sup>1</sup>, Krystal Herline<sup>1</sup> and  
Thomas Wisniewski<sup>1,2,3\*</sup>

<sup>1</sup>Center for Cognitive Neurology and Department of Neurology, New York University School of Medicine, New York, New York, USA. Departments of <sup>2</sup>Pathology and <sup>3</sup>Psychiatry, New York University School of Medicine, New York, New York, USA.

\*Correspondence should be addressed to T.W. ([Thomas.Wisniewski@nyumc.org](mailto:Thomas.Wisniewski@nyumc.org)) or F.G. ([Fernando.Goni@nyumc.org](mailto:Fernando.Goni@nyumc.org))

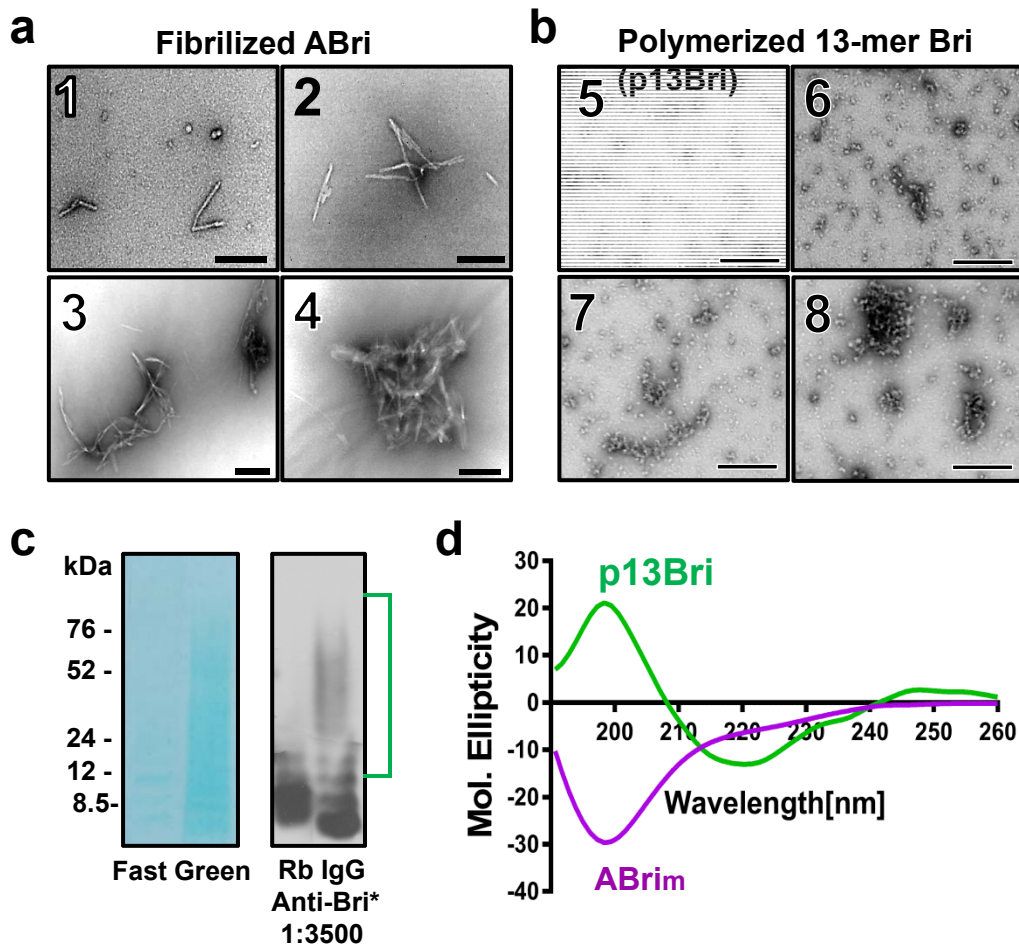

**Supplementary Figure 1. Characterization of the ABri and Polymerized immunogenic 13-mer Bri (p13Bri) Peptides.** a) Electron microscopy (EM) of the sequential fibrillization of the ABri peptide; 1) 24 hours incubation at room temperature (RT); 2) one week incubation at RT with associated fibrils; 3) and 4) two weeks incubation at RT, big clusters of precipitated long fibrils. Scale bars represent 200  $\mu\text{m}$ . b) EM images of 13-mer Bri peptide after controlled polymerization with glutaraldehyde (p13Bri) showing different oligomeric states; 5) two hours after preparation of the sample; 6) one week after incubation at RT and, 7) and 8) after two weeks of incubation at RT. Scale bars represent 200  $\mu\text{m}$ . c) Nitrocellulose blot from 15% SDS-PAGE of the ABri (lane 1) and p13Bri (lane 2) peptides. Left panel, fast green protein reversible stain; right panel immunoblot with anti-Bri antibody kindly provided by Dr. R. Vidal IUPUI. Green bracket marks oligomeric state between 10-100 kDa. d) Circular dichroism of the p13Bri peptide all  $\beta$  structure (green) and ABri monomer (purple).

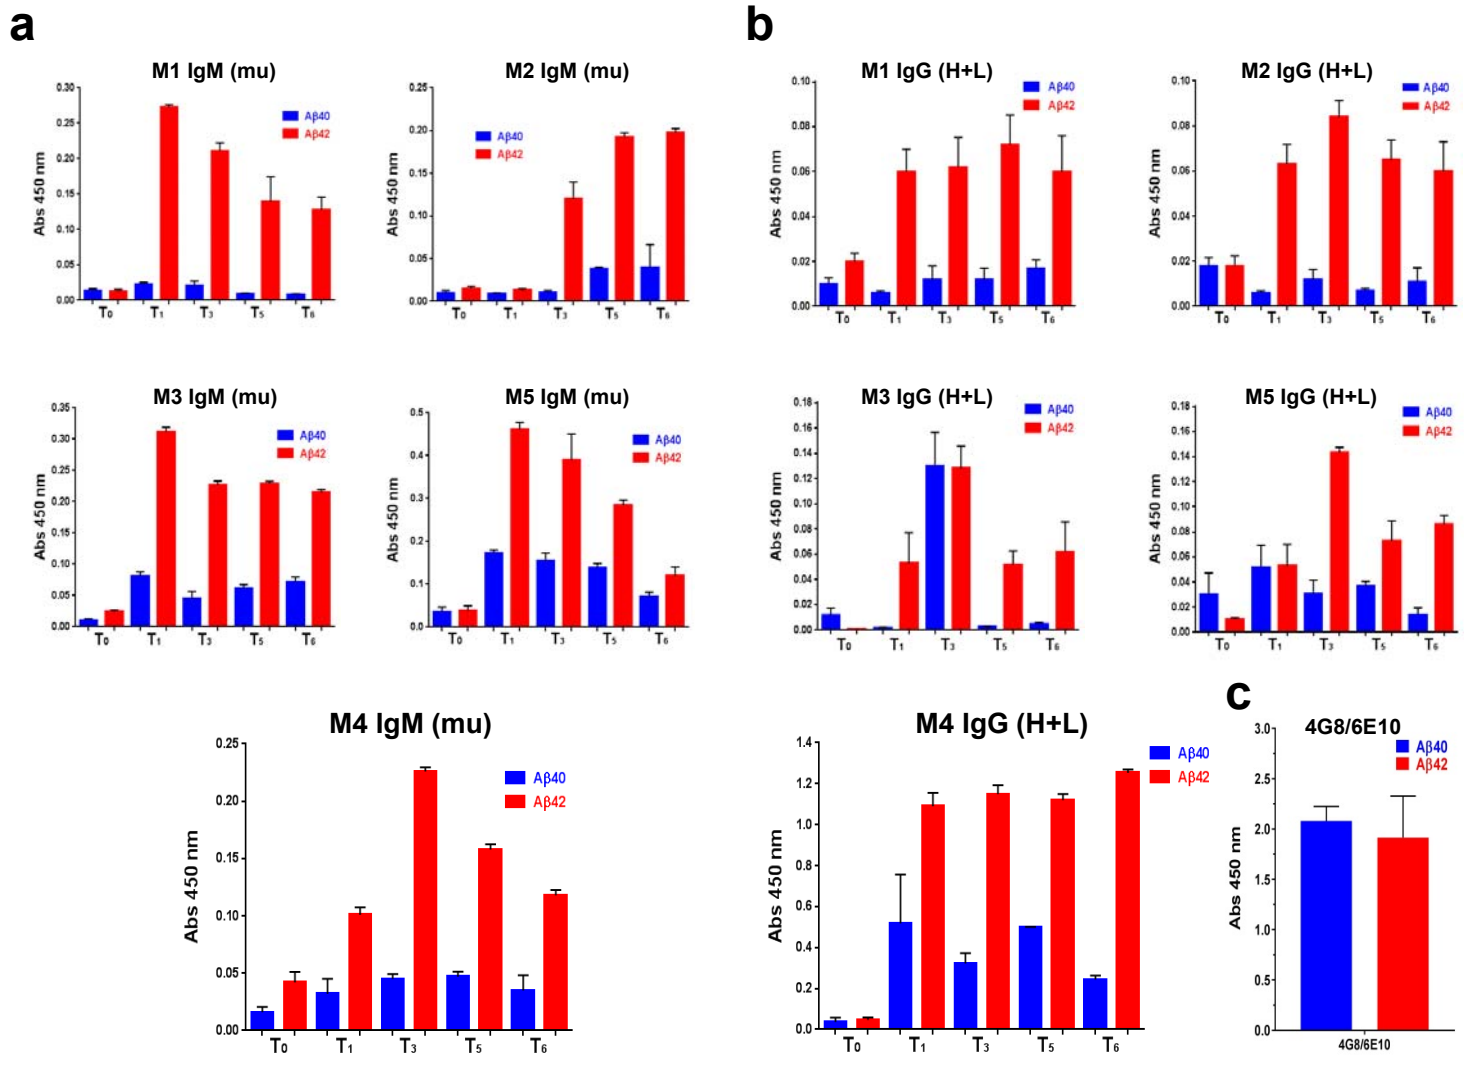

**Supplementary Figure 2. Plasma Levels of Anti-Aβ 1-40 and Anti-Aβ 1-42 from p13Bri Inoculated CD-1 Mice.** a) ELISA data showing plasma reactivity to Aβ40 and Aβ42 from different bleedings of all CD-1 mice as per supplementary table 1, using peroxidase-labelled goat anti-mouse IgM (μ chain). Samples were run on triplicate. b) ELISA data showing plasma reactivity to Aβ40 and Aβ42 from different bleedings of all CD-1 mice using peroxidase-labelled goat anti-mouse IgG (H+L). Samples were run on triplicate. c) Plate coating control showing similar reactivity detected for Aβ40 and Aβ42 with commercial antibodies 4G8/6E10 and secondary anti-mouse IgG (H+L).

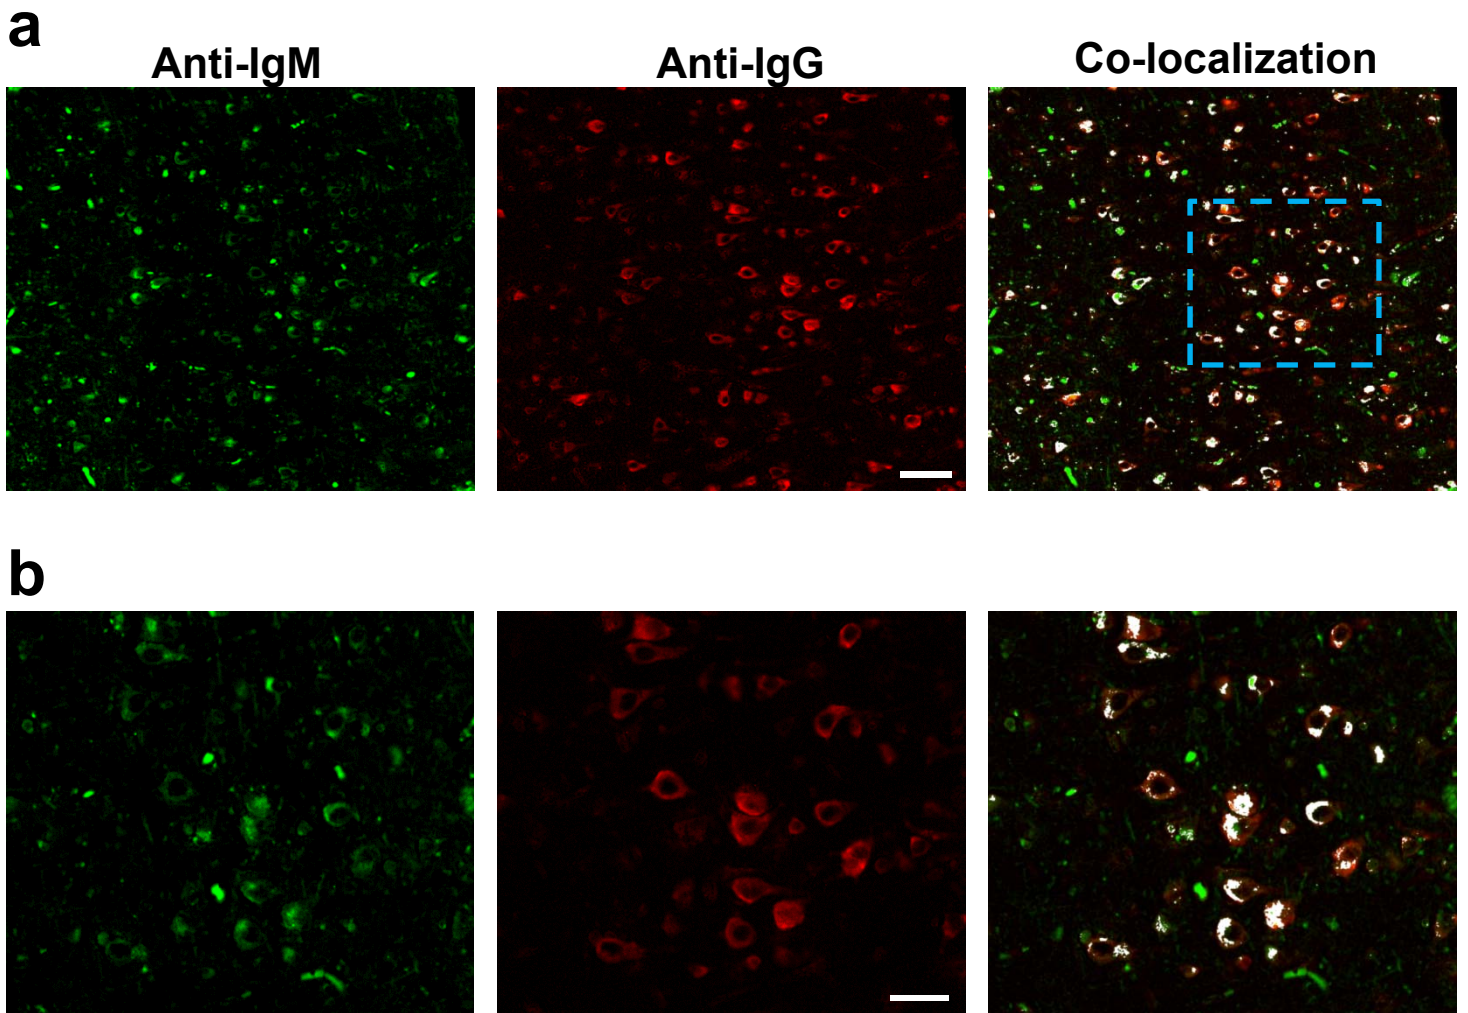

**Supplementary Figure 3. Co-localization on Human AD brains of IgM and IgG antibodies present in the plasma of the p13Bri inoculated CD-1 M4 mouse: a)** Representative images showing the co-localization on the cortex of human AD brains of IgM and IgG antibodies present in the plasma of CD-1 M4 mouse inoculated with p13Bri. A combined T6+Tf pool was used as per table 1. **b)** Higher magnification of the boxed area in a).

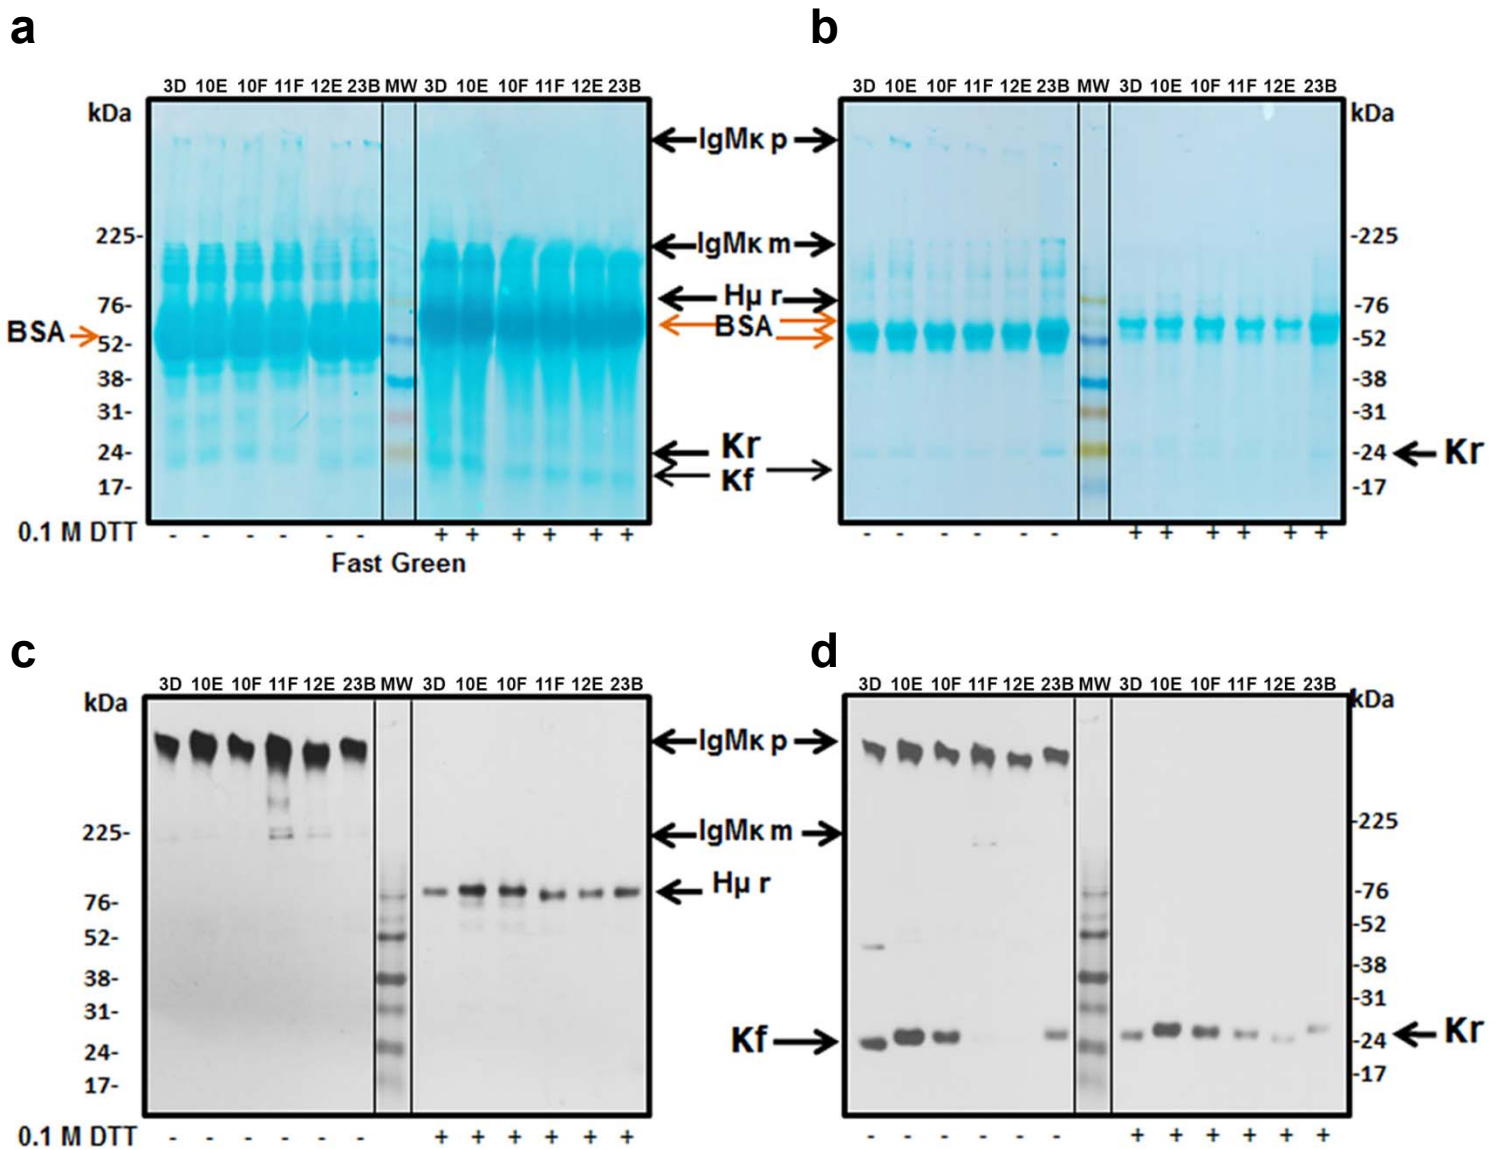

**Supplementary Figure 4. Purification and Characterization of anti  $\beta$ -sheet secondary structure conformational monoclonal antibodies obtained from the fusion of p13Bri hyper-immunized M4 CD-1 mouse spleen cells with SP2/mIL-6 fusion partner.** a) Fast Green of cell supernatants of hybridomas 3D, 10E, 10F, 11F, 12E and 23B obtained from the fusion of spleen cells of p13Bri immunized M4 mouse and SP2/0-IL6 fusion partner. Large amount of bovine serum albumin (BSA) from the growth media supplementation is shown. b-d). Western blot of the 40% saturated Ammonium Sulfate (SAS) purified antibodies from clones 3D, 10E, 10F, 11F, 12E and 23B. b) Fast Green stain with residual BSA; c) Anti-mouse IgM  $\mu$  reactivity and, d) anti-mouse Kappa reactivity. Left part of the blots show untreated samples and right part 0.1M Dithiothreitol (DTT) disulfide bridges reduced samples. IgMk p: pentameric IgM; IgMk m: monomeric IgM; H $\mu$  r: mu Heavy chain reduced; Kf: free kappa Light chains and Kr: reduced kappa light chains.

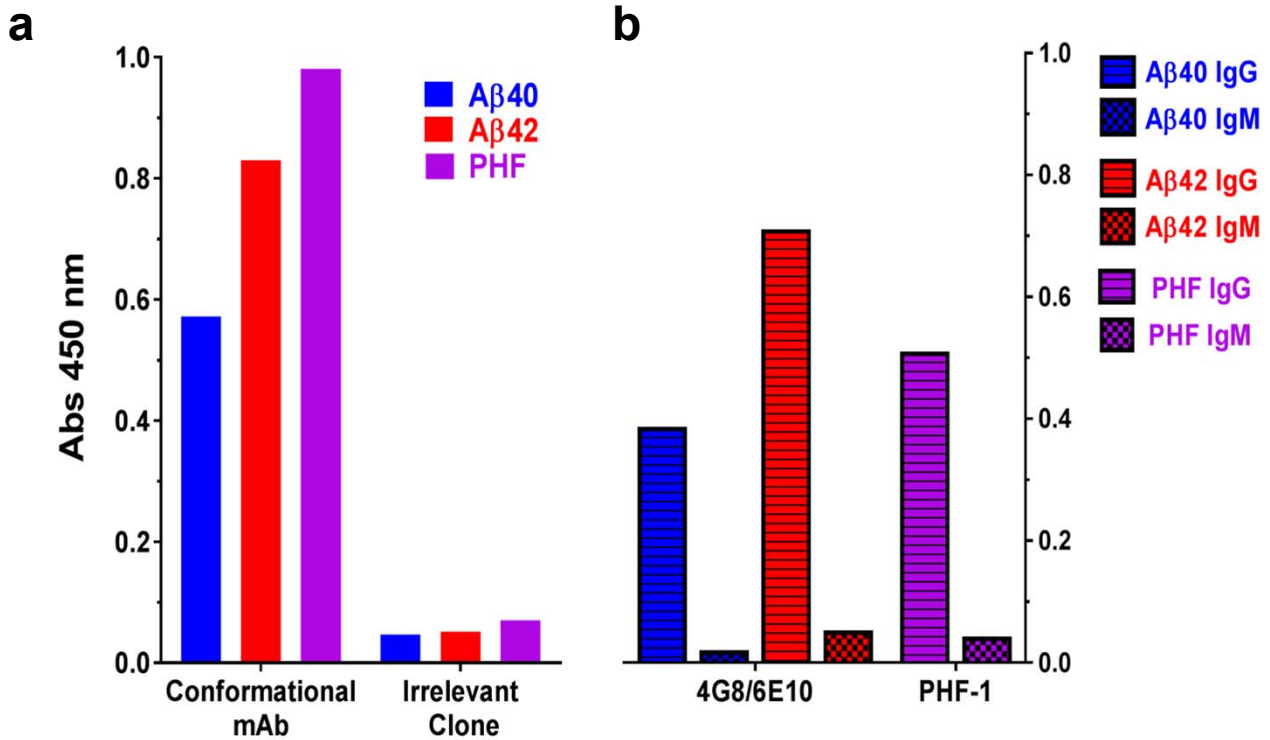

**Supplementary Figure 5. Control of protein/peptide coat and IgM reactivity in ELISA plates of Aβ1-40, Aβ1-42 and PHF.** a) Typical ELISA plates coated with Aβ1-40, Aβ1-42 or PHF as per Figure 2, showing the difference between a clone with potential conformational monoclonal antibody and an irrelevant clone to mark the background IgM reactivity on a cell supernatant that had comparable number of cells. b) Control of the coat in each ELISA plate with commercial mouse IgG anti-Aβ 4G8 and 6E10 and commercial IgG anti-PHF PHF-1. Background anti-IgM reactivity is similar to the irrelevant clone.

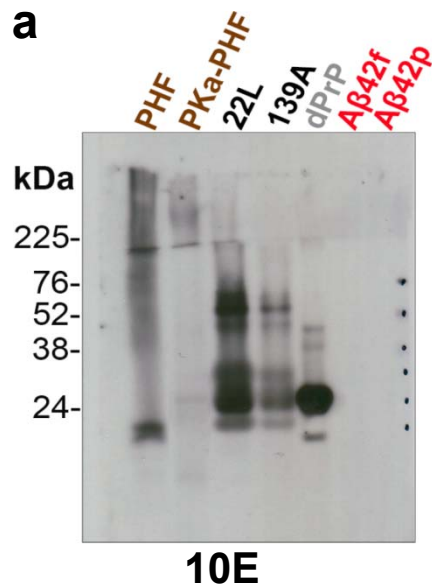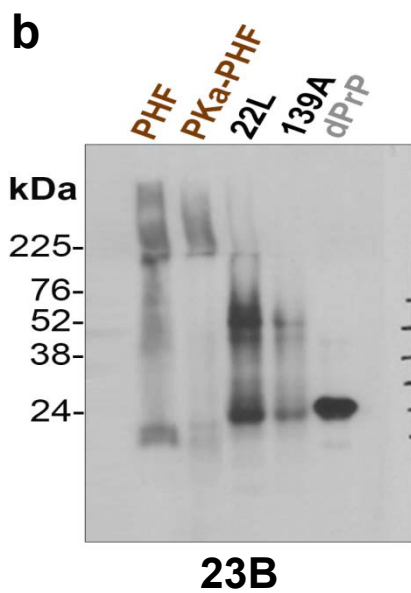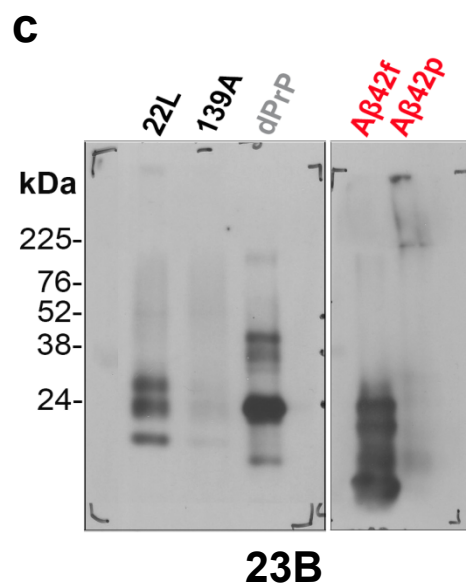

**Supplementary Figure 6. Reactivity of anti  $\beta$ -sheet secondary structure conformational monoclonal antibodies 10E and 23B against Paired Helical Filaments (PHF), Amyloid- $\beta$  42 and PrP preparations in uncropped blots that are shown in figure 3 of the main manuscript. a. Western blot showing the reactivity of conformational mAb 10E against PHF and PKa digested PHF, scrapie 22L PrP<sup>Res</sup>, scrapie 139A PrP<sup>Res</sup> and dPrP. b. Conformational mAb 23B reactivity against PHF, Pka digested PHF, scrapie 22L PrP<sup>Res</sup>, scrapie 139A PrP<sup>Res</sup> and dPrP. c. Reactivity of the conformational mAb 23B against scrapie 22L PrP<sup>Res</sup>, scrapie 139A PrP<sup>Res</sup>, dPrP, fibrilized A $\beta$  (A $\beta$ 42f) and polymerized A $\beta$ 42 (A $\beta$ 42p).**

**Supplementary Table 1. Protocol for the Immunization of CD-1 Mice (M1 to M5) with p13Bri for the Production of anti-conformational Antibodies.**

| Date of Inoculation (in days) | p13Bri Antigen (µg/animal)*      | Antigen to Adjuvant Ratio** | Route of Inoculation | Identification of Bleed     | Date of Bleed (in days) |
|-------------------------------|----------------------------------|-----------------------------|----------------------|-----------------------------|-------------------------|
| -                             | ---                              | ---                         | ---                  | Pre-Immune T0               | -7                      |
| 0                             | 50                               | 4:1                         | s.c.                 | -                           | -                       |
| 14                            | 50                               | 4:1                         | s.c.                 | -                           | -                       |
| -                             | -                                | -                           | -                    | T1                          | 21                      |
| 28                            | 20                               | 9:1                         | s.c.                 | -                           | -                       |
| -                             | -                                | -                           | -                    | T2                          | 35                      |
| 49                            | 20                               | 9:1                         | s.c.                 | -                           | -                       |
| -                             | -                                | -                           | -                    | T3                          | 56                      |
| 69                            | 20                               | 9:1                         | s.c.                 | -                           | -                       |
| -                             | -                                | -                           | -                    | T4                          | 76                      |
| 91                            | 20                               | 9:1                         | s.c.                 | -                           | -                       |
| -                             | -                                | -                           | -                    | T5                          | 98                      |
| 119                           | 20                               | 9:1                         | s.c.                 | -                           | -                       |
| -                             | -                                | -                           | -                    | T6                          | 126                     |
| 140                           | 20 (no M4)                       | 9:1                         | s.c.                 | -                           | -                       |
| -                             | -                                | -                           | -                    | T7                          | 147                     |
| 161                           | 20 (no M4)                       | 9:1                         | s.c.                 | -                           | -                       |
| -                             | -                                | -                           | -                    | T8                          | 168                     |
| 165                           | <b>10 (only M4)</b>              | <b>no adjuvant</b>          | <b>i.v.</b>          | -                           | -                       |
| 169                           | <b>M4 Fusion to SP2/0-IL6***</b> | -                           | -                    | <b>terminal bleeding M4</b> | 169                     |
| 181                           | 20                               | 9:1                         | s.c.                 | -                           | -                       |
| -                             | -                                | -                           | -                    | T9                          | 189                     |
| 201                           | 20                               | 9:1                         | s.c.                 | -                           | -                       |
| -                             | -                                | -                           | -                    | T10                         | 208                     |
| 258                           | 20                               | 9:1                         | s.c.                 | -                           | -                       |
| -                             | -                                | -                           | -                    | T11                         | 265                     |
| 332                           | <b>10 (M1, M2, M3,M5)</b>        | <b>no adjuvant</b>          | <b>i.v.</b>          | -                           | -                       |
| 336                           | <b>M1+M2 Fused SP2/0-IL6***</b>  | -                           | -                    | <b>TTB M1,M2, M3,M5</b>     | 336                     |
| 336                           | <b>M3+M5 Fused SP2/0-IL6***</b>  | -                           | -                    | <b>TTB M1,M2, M3,M5</b>     | 336                     |
| -                             | -                                | -                           | -                    | <b>M1+M2 Frozen</b>         | 341                     |
| -                             | -                                | -                           | -                    | <b>M3+M5 Frozen</b>         | 341                     |

\* All animals inoculated unless indicated. \*\*: Alum M1, M2; Sigma adjuvant system: M3, M4, M5. s.c.: subcutaneous. i.v.: intravenous. TTB: Terminal bleeding. \*\*\*: Fusion partner
